# Supplementary material for: Hyaluronan and Collagen Are Prominent Extracellular Matrix Components in Bovine and Porcine Ovaries
Source: MDPI journal article supplement (doi:10.3390/genes12081186), 2021-07-30
Supplement: s1 [file s1]

## Supplemental Material

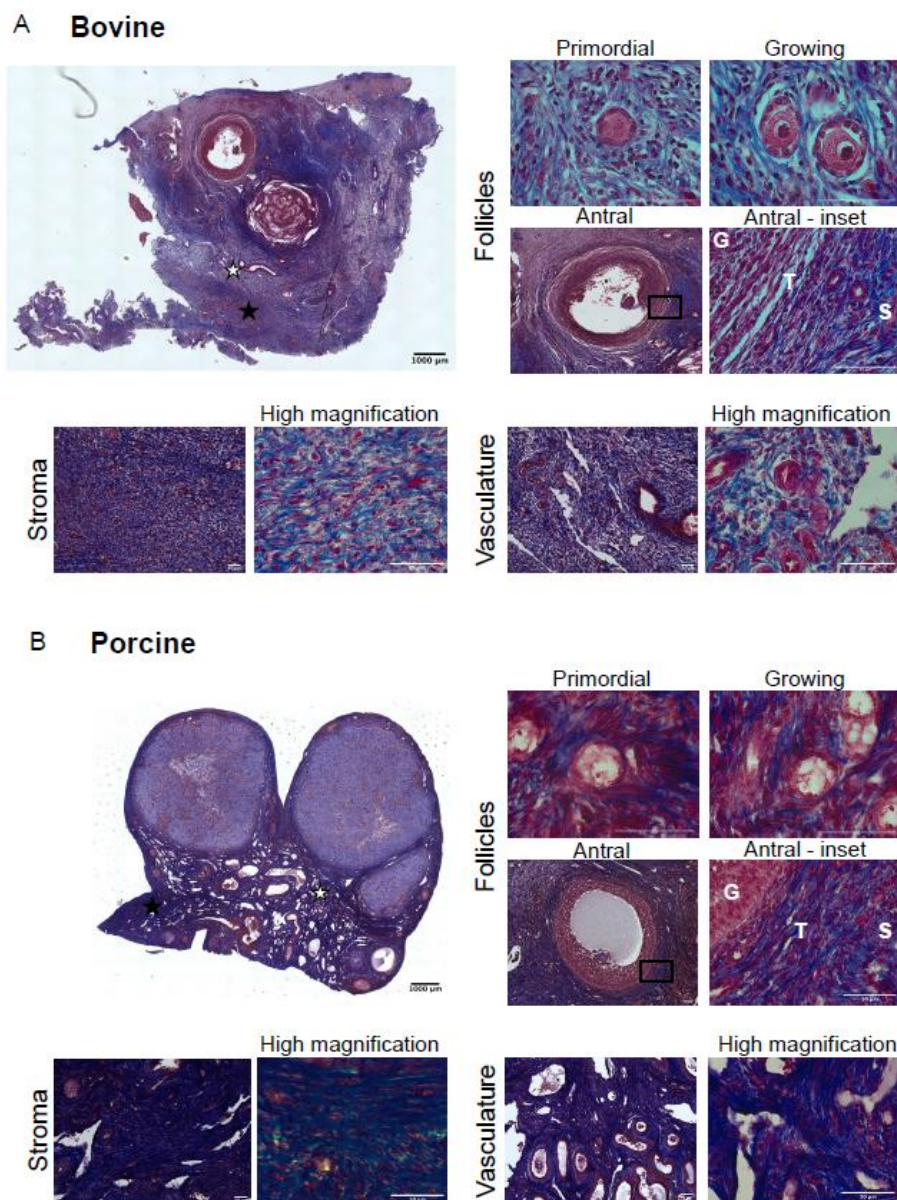

**Figure 1. Bovine and porcine ovaries are enriched in collagen.** Masson's trichrome (MTC) staining was used to detect collagen (blue) in (A) bovine or (B) porcine ovaries. In the low magnification whole tissue section images of both species, black stars indicate the location of the stroma and white stars indicate the location of the vasculature. Collagen was found around primordial follicles, growing follicles, and antral follicles of both species. The high magnification porcine antral follicle image was taken from a different ovarian tissue section. S – stroma, T – theca cell layer, G – granulosa cell layer. The scale bars are in 1000 µm in the low magnification whole ovarian tissue section images, 10 µm in the primordial and growing follicle images, and 50 µm in the antral follicle, stroma, and vasculature images. MTC Images are representative of  $n = 2$  cows,  $n = 1$  ovary/cow, 2 sections/ovary or  $n = 2$  pigs,  $n = 2$  ovaries/pig, 2 sections/ovary.

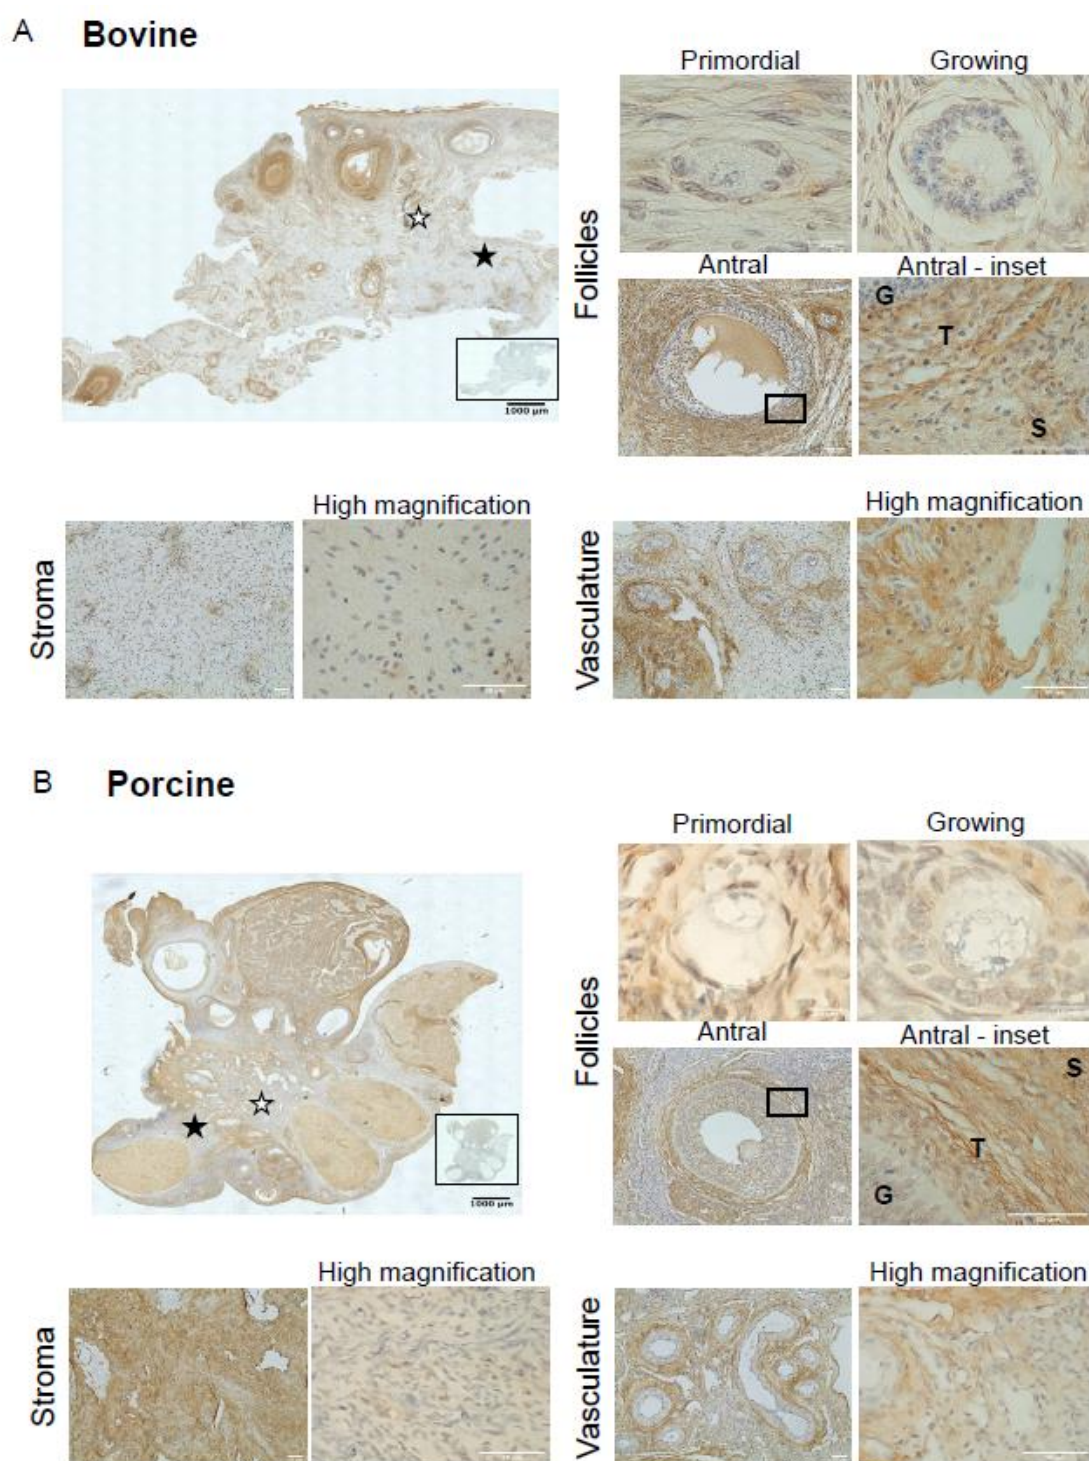

**Figure 2. Bovine and porcine ovaries are enriched in hyaluronan.** Chromogenic HABP staining was used to detect HA (brown) in (A) bovine or (B) porcine ovaries. The insets illustrate HABP staining after pretreating a serial bovine or porcine ovarian tissue section with hyaluronidase. In the low magnification whole tissue section images of both species, black stars indicate the location of the stroma and white stars indicate the location of the vasculature. HA was identified in primordial, growing, and the antral follicles. The high magnification porcine antral follicle image was taken from a different ovarian tissue section. S – stroma, T – theca cell layer, G – granulosa cell layer. The scale bars are in 1000  $\mu$ m in the low magnification whole ovarian tissue section images, 10  $\mu$ m in the primordial and growing follicle images, and 50  $\mu$ m in the antral follicle, stroma, and vasculature images. Images are representative of  $n = 2$  cows,  $n = 1$  ovary/cow,  $n = 2$  sections/ovary and  $n = 2$  pigs,  $n = 2$  ovaries/pig,  $n = 2$  sections/ovary.



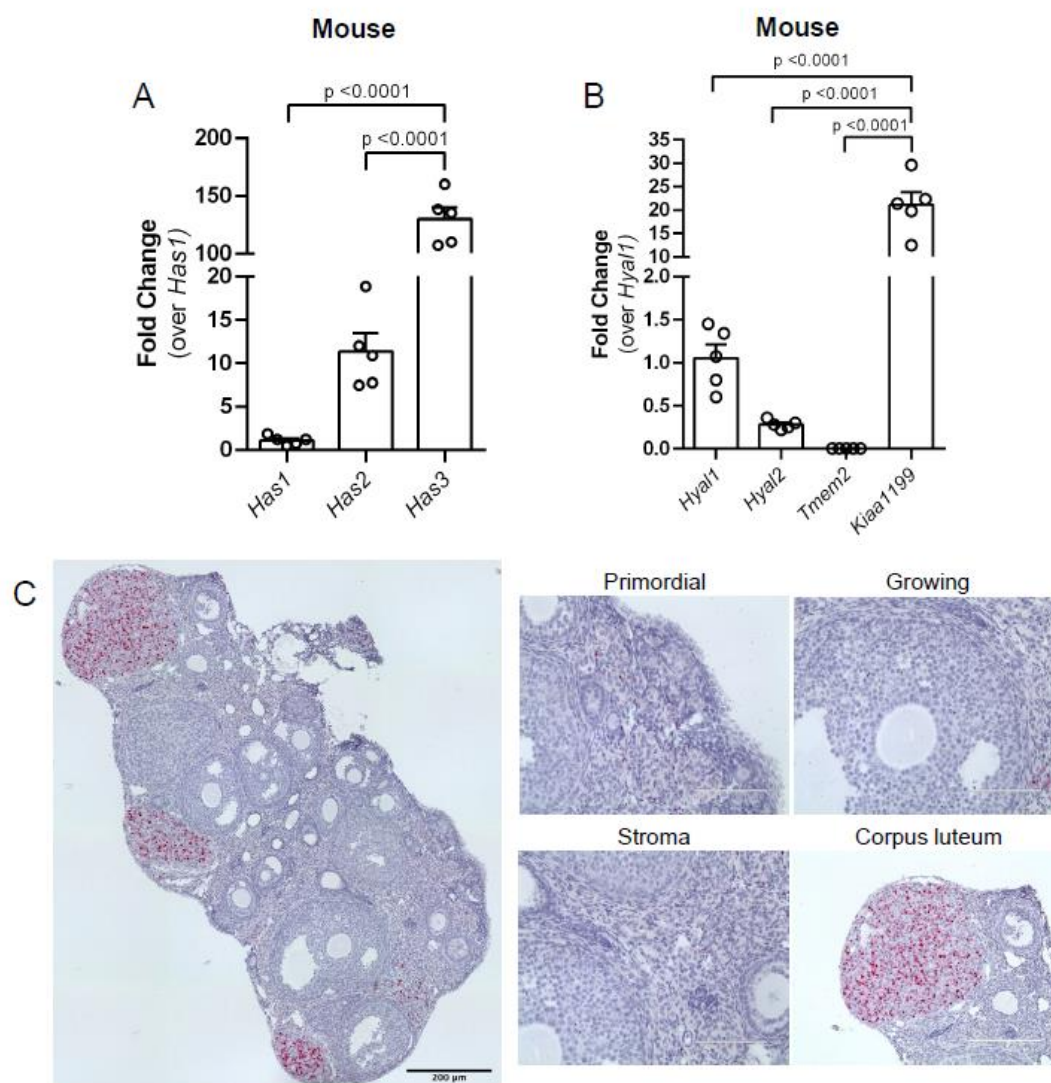

**Figure 3. Mouse ovary hyaluronan synthase and hyaluronidase transcript content.** Relative hyaluronan synthase (A) and hyaluronidase (B) gene expression in mouse ovarian stromal tissue. Hyaluronan synthase transcript data are shown as fold change over *Has1*, while hyaluronidase transcript data are shown as a fold change over *Hyal1*,  $n = 5$  mice,  $n = 1$  ovary/mouse. Circles represent values from individual animals. Statistical analysis was performed using one-way ANOVA.  $p$ -values are as indicated. (C) *Kiaa1199* transcripts (pink) were identified in a whole mouse ovarian tissue section, in primordial and growing follicles, and in ovarian stroma and corpus luteum using RNA *in situ* hybridization. The scale bars are in 200  $\mu$ m in the low magnification whole mouse ovarian tissue section, 100  $\mu$ m in the primordial and growing follicle images and in the stroma images, and 200  $\mu$ m in the corpus luteum image. Images are representative of  $n = 2$  mice,  $n = 1$  ovary/mouse,  $n = 3$  sections/mouse.

Supplementary Table S1: Primers and primer/probe assays used for RT-PCR

| Species | Company                     | Chemistry                     | Unique assay ID                                  | Gene            | Region                                          | Sequences                                                          |
|---------|-----------------------------|-------------------------------|--------------------------------------------------|-----------------|-------------------------------------------------|--------------------------------------------------------------------|
| Cow     | Invitrogen                  | TaqMan Assay                  | Bt07109172_g1                                    | <i>Has1</i>     | Both primers and probe map within a single exon | Proprietary                                                        |
| Cow     | Invitrogen                  | TaqMan Assay                  | Bt03212695_g1                                    | <i>Has2</i>     | Probe spans exons                               | Proprietary                                                        |
| Cow     | Invitrogen                  | TaqMan Assay                  | Bt04298491_m1                                    | <i>Has3</i>     | Probe spans exons                               | Proprietary                                                        |
| Cow     | Invitrogen                  | TaqMan Assay                  | Bt03219822_m1                                    | <i>Hyal1</i>    | Probe spans exons                               | Proprietary                                                        |
| Cow     | Invitrogen                  | TaqMan Assay                  | Bt03223415_m1                                    | <i>Hyal2</i>    | Probe spans exons                               | Proprietary                                                        |
| Cow     | Invitrogen                  | TaqMan Assay                  | Bt04312260_m1                                    | <i>Tmem2</i>    | Probe spans exons                               | Proprietary                                                        |
| Cow     | Invitrogen                  | TaqMan Assay                  | Bt03256165_m1                                    | <i>Gusb</i>     | Probe spans exon                                | Proprietary                                                        |
| Cow     | Bio-Rad                     | Prime PCR SYBR Green Assay    | qBtaCED0009350                                   | <i>Col1a1</i>   | Exonic                                          | Proprietary                                                        |
| Cow     | Bio-Rad                     | Prime PCR SYBR Green Assay    | qBtaCED0017751                                   | <i>Col3a1</i>   | Exonic                                          | Proprietary                                                        |
| Cow     | Bio-Rad                     | Prime PCR SYBR Green Assay    | qBtaCID0004725                                   | <i>Gusb</i>     | Intron spanning                                 | Proprietary                                                        |
| Pig     | Bio-Rad                     | Prime PCR Probe Assay         | qSscCEP0032506                                   | <i>Has1</i>     | Exonic                                          | Proprietary                                                        |
| Pig     | Bio-Rad                     | Prime PCR Probe Assay         | qSscCEP0030548                                   | <i>Has2</i>     | Exonic                                          | Proprietary                                                        |
| Pig     | Bio-Rad                     | Prime PCR Probe Assay         | qSscCEP0032789                                   | <i>Hyal1</i>    | Exonic                                          | Proprietary                                                        |
| Pig     | Bio-Rad                     | Prime PCR Probe Assay         | qSscCEP0032796                                   | <i>Hyal2</i>    | Exonic                                          | Proprietary                                                        |
| Pig     | Bio-Rad                     | Prime PCR Probe Assay         | qSscCIP0027390                                   | <i>Kiaa1199</i> | Intron spanning                                 | Proprietary                                                        |
| Pig     | Bio-Rad                     | Prime PCR Probe Assay         | qSscCIP0034945                                   | <i>Gusb</i>     | Intron spanning                                 | Proprietary                                                        |
| Pig     | Bio-Rad                     | Prime PCR SYBR Green Assay    | qSscCED0020342                                   | <i>Col1a1</i>   | Exonic                                          | Proprietary                                                        |
| Pig     | Bio-Rad                     | Prime PCR SYBR Green Assay    | qSscCID0003467                                   | <i>Col3a1</i>   | Intron spanning                                 | Proprietary                                                        |
| Pig     | Bio-Rad                     | Prime PCR SYBR Green Assay    | qSscCID0013585                                   | <i>Gusb</i>     | Intron spanning                                 | Proprietary                                                        |
| Mouse   | Invitrogen                  | TaqMan Assay                  | Mm03048195_m1                                    | <i>Has1</i>     | Probe spans exons                               | Proprietary                                                        |
| Mouse   | Invitrogen                  | TaqMan Assay                  | Mm00515089_m1                                    | <i>Has2</i>     | Probe spans exons                               | Proprietary                                                        |
| Mouse   | Invitrogen                  | TaqMan Assay                  | Mm00515092_m1                                    | <i>Has3</i>     | Probe spans exons                               | Proprietary                                                        |
| Mouse   | Invitrogen                  | TaqMan Assay                  | Mm01197698_m1                                    | <i>Gusb</i>     | Probe spans exons                               | Proprietary                                                        |
| Mouse   | Integrated DNA Technologies | Power SYBR Green (Invitrogen) | PrimerBank ID: 145966880b3                       | <i>Hyal1</i>    | Exonic                                          | F:<br>TTCGATGTGGTTGCCAAC<br>AAG<br>R:<br>AGGTGCCCAATTCCTCTCT<br>GT |
| Mouse   | Integrated DNA Technologies | SYBR Green                    | PrimerBank ID: 45331201b1                        | <i>Hyal2</i>    | Intron spanning                                 | F:<br>GCAGGACTAGGTCCCATC<br>ATC<br>R:<br>TTCCATGCTACCACAAAG<br>GGT |
| Mouse   | Integrated DNA Technologies | SYBR Green                    | Designed by Dr. Chris Ward, using XM_006527487.3 | <i>Tmem2</i>    | Intron spanning                                 | F:<br>CTTTACCTTCCGGAGTGCA<br>G                                     |

|               |                                |                          |                                    |                 |                   |                                                                   |
|---------------|--------------------------------|--------------------------|------------------------------------|-----------------|-------------------|-------------------------------------------------------------------|
|               |                                |                          | (now<br>NM_031997.4)               |                 |                   | R:<br>CCGCTGAATCCCAAAAAT<br>AC                                    |
| Mouse         | Integrated DNA<br>Technologies | SYBR Green               | NM_030728.4                        | <i>Kiaa1199</i> | Intron spanning   | F:<br>TGATGGGAGTCGAGGTCA<br>C<br>R:<br>GAGCACTATGGAATTGTC<br>AGG  |
| Mouse         | Integrated DNA<br>Technologies | SYBR Green               | PrimerBank ID:<br>6754098a1        | <i>Gusb</i>     | Intron spanning   | F:<br>GGCTGGTGACCTACTGGA<br>TTT<br>R:<br>GGCACTGGGAACCTGAAG<br>T  |
| Mouse         | Integrated DNA<br>Technologies | SYBR Green               | World J. Gastro.<br>2012 4(12):356 | <i>Col1a1</i>   | Intron spanning   | F:<br>ATGTTTCAGCTTTGTGGACC<br>TC<br>R:<br>CAGAAAGCACAGCACTCG<br>C |
| Mouse         | Integrated DNA<br>Technologies | SYBR Green               | PrimerBank ID:<br>33859526a1       | <i>Col3a1</i>   | Exonic            | F:<br>ACGTAGATGAATTGGGAT<br>GCAG<br>R:<br>GGGTTGGGGCAGTCTAGT<br>G |
| Goat<br>*Cow  | Invitrogen                     | TaqMan Assay             | Ch04792899_m1                      | <i>Kiaa1199</i> | Probe spans exons | Proprietary                                                       |
| Human<br>*Pig | Bio-Rad                        | Prime PCR Probe<br>Assay | qHsaCIP0026619                     | <i>Has3</i>     | Intron spanning   | Proprietary                                                       |
| Human<br>*Pig | Bio-Rad                        | Prime PCR Probe<br>Assay | qHsaCIP0032990                     | <i>Tmem2</i>    | Intron spanning   | Proprietary                                                       |

\*For cow *Kiaa1199*, pig *Has3*, and pig *Tmem2*, goat *Kiaa1199*, human *Has3*, and human *Tmem2* Prime PCR assays, respectively, were used as the primer and probe sequences for the paired species were identical (per Bio-Rad).
